# Supplementary material for: Prepregnancy SHBG Concentrations and Risk for Subsequently Developing Gestational Diabetes Mellitus
Source: Oxford University Press journal article supplement (doi:10.2337/dc13-1965), 2014-02-22
Supplement: dc131965supplementarydata.pdf [file dc131965supplementarydata.pdf]

SUPPLEMENTARY DATA

**Supplementary Table 1.** Odds ratios (OR) and 95% confidence intervals (CI) for GDM associated with SHBG concentrations <sup>1</sup>

|                                  | <b>Conditional Logistic Regression Models</b> |                                     |                                     |
|----------------------------------|-----------------------------------------------|-------------------------------------|-------------------------------------|
|                                  | Crude                                         | Multivariable-adjusted <sup>2</sup> | Multivariable-adjusted <sup>3</sup> |
| <b>Pre-Pregnancy Risk Factor</b> | <b>OR (95% CI)</b>                            |                                     |                                     |
| <i>SHBG (nmol/L)</i>             |                                               |                                     |                                     |
| 1 Standard Deviation (58.5)      | 1.85 (1.45 - 2.37)                            | 1.61 (1.25 - 2.08)                  | 1.94 (1.33 - 2.83)                  |
| Quartile 1 (8.04 - 44.23)        | 4.44 (2.65 - 7.44)                            | 3.45 (1.96 - 6.08)                  | 4.01 (1.86 - 8.66)                  |
| Quartile 2 (44.24 - 64.53)       | 1.79 (1.07 - 2.99)                            | 2.03 (1.15 - 3.58)                  | 2.56 (1.16 - 5.65)                  |
| Quartile 3 (64.54 - 99.73)       | 1.23 (0.71 - 2.13)                            | 1.30 (0.71 - 2.38)                  | 1.11 (0.46 - 2.66)                  |
| Quartile 4 (99.74 - 537.57)      | 1.00                                          | 1.00                                | 1.00                                |

<sup>1</sup> Excluding women diagnosed with PCOS (cases, n=243; controls, n=486)

<sup>2</sup> Adjusted for race/ethnicity, pre-pregnancy BMI, family history of diabetes, and alcohol use at time of the MHC exam

<sup>3</sup> Further adjusted for HOMA-IR index and weight change between MHC exam and index pregnancy; Subset of women fasting for more than 6 hours at the time of MHC exam (cases, n=144; controls, n=267)

SUPPLEMENTARY DATA

**Supplementary Table 2.** Odds ratios (OR) and 95% confidence intervals (CI) for GDM associated with SHBG concentrations<sup>1</sup>

|                                  | <b>Conditional Logistic Regression Models</b> |                                     |                                     |
|----------------------------------|-----------------------------------------------|-------------------------------------|-------------------------------------|
|                                  | Crude                                         | Multivariable-adjusted <sup>2</sup> | Multivariable-adjusted <sup>3</sup> |
| <b>Pre-Pregnancy Risk Factor</b> | <b>OR (95% CI)</b>                            |                                     |                                     |
| <i>SHBG (nmol/L)</i>             |                                               |                                     |                                     |
| 1 Standard Deviation (58.5)      | 2.00 (1.55 - 2.57)                            | 1.68 (1.29 - 2.19)                  | 2.21 (1.48 - 3.31)                  |
| Quartile 1 (8.04 - 44.23)        | 4.61 (2.77 - 7.69)                            | 3.47 (1.98 - 6.09)                  | 4.25 (1.95 - 9.26)                  |
| Quartile 2 (44.24 - 64.53)       | 1.81 (1.08 - 3.03)                            | 1.93 (1.09 - 3.42)                  | 2.33 (1.05 - 5.19)                  |
| Quartile 3 (64.54 - 99.73)       | 1.22 (0.70 - 2.12)                            | 1.25 (0.68 - 2.29)                  | 1.11 (0.46 - 2.69)                  |
| Quartile 4 (99.74 - 537.57)      | 1.00                                          | 1.00                                | 1.00                                |

<sup>1</sup> Excluding women taking hormonal contraceptives at the time of the MHC exam (cases, n=249; controls, n=486)

<sup>2</sup> Adjusted for race/ethnicity, pre-pregnancy BMI, family history of diabetes, and alcohol use at time of the MHC exam

<sup>3</sup> Further adjusted for HOMA-IR index and weight change between MHC exam and index pregnancy; Subset of women fasting for more than 6 hours at the time of MHC exam (cases, n=146; controls, n=265)
